# Supplementary material
Source: MDPI journal article supplement (https://www.mdpi.com/2076-3417/12/14/6917)
Supplement: s1 [file s1]

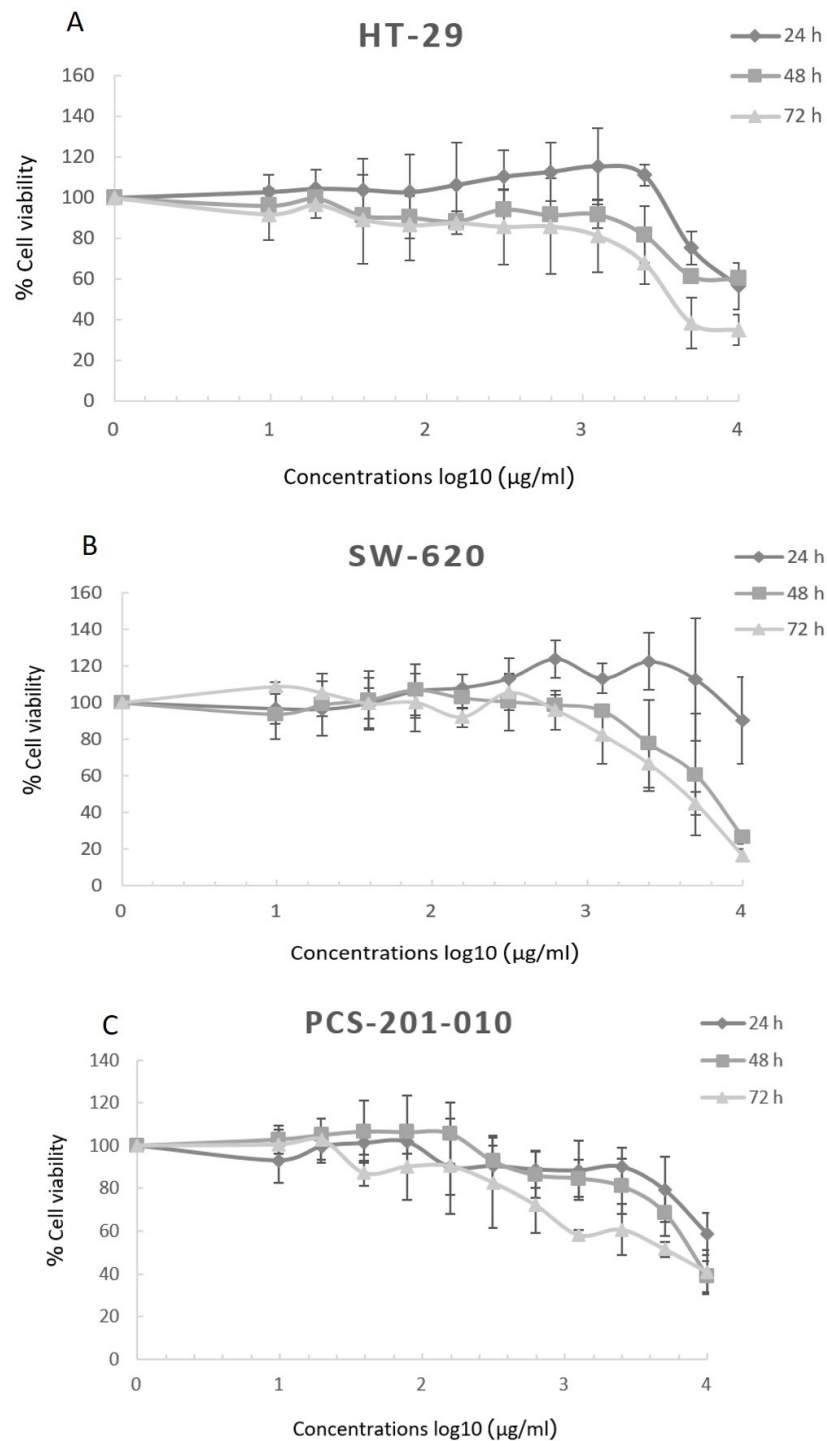

**Figure S1.** Cytotoxicity test by MTT assay on non-metastatic colon cancer cell line (HT-29) (A), metastatic colon cancer cell line (SW-620) (B) and normal human fibroblast cell line (PCS-201-010) (C) after treated with HRBE concentrations (0 – 10,000 μg/mL) for 24 h, 48 h and 72 h. The percentage of cell viability was determined as compared to an untreated condition. Data represented in the mean ± SD.

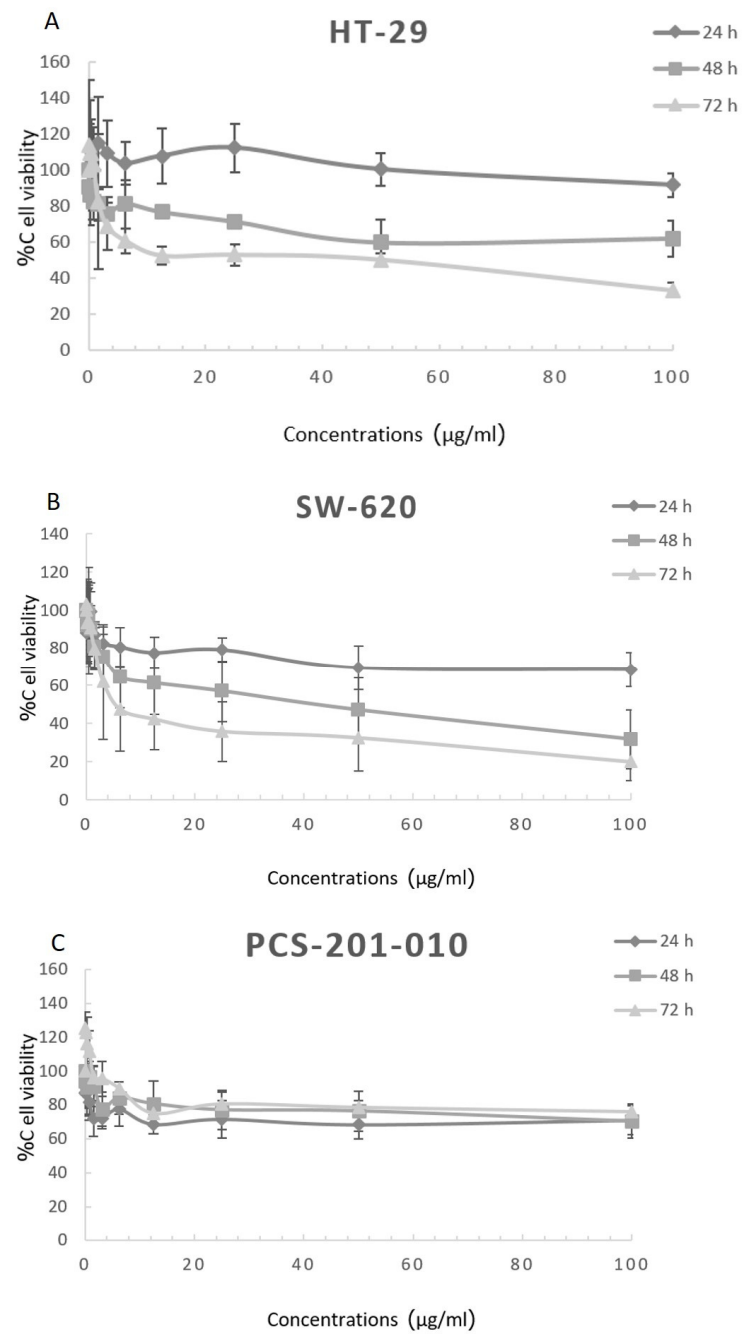

**Figure S2.** Cytotoxicity test by MTT assay on non-metastatic colon cancer cell line (HT-29) (A), metastatic colon cancer cell line (SW-620) (B) and normal human fibroblast cell line (PCS-201-010) (C) after treated with mitomycin C concentrations (0 – 10,000  $\mu\text{g/mL}$ ) for 24 h, 48 h and 72 h. The percentage of cell viability was determined as compared to an untreated condition. Data represented in the mean  $\pm$  SD.

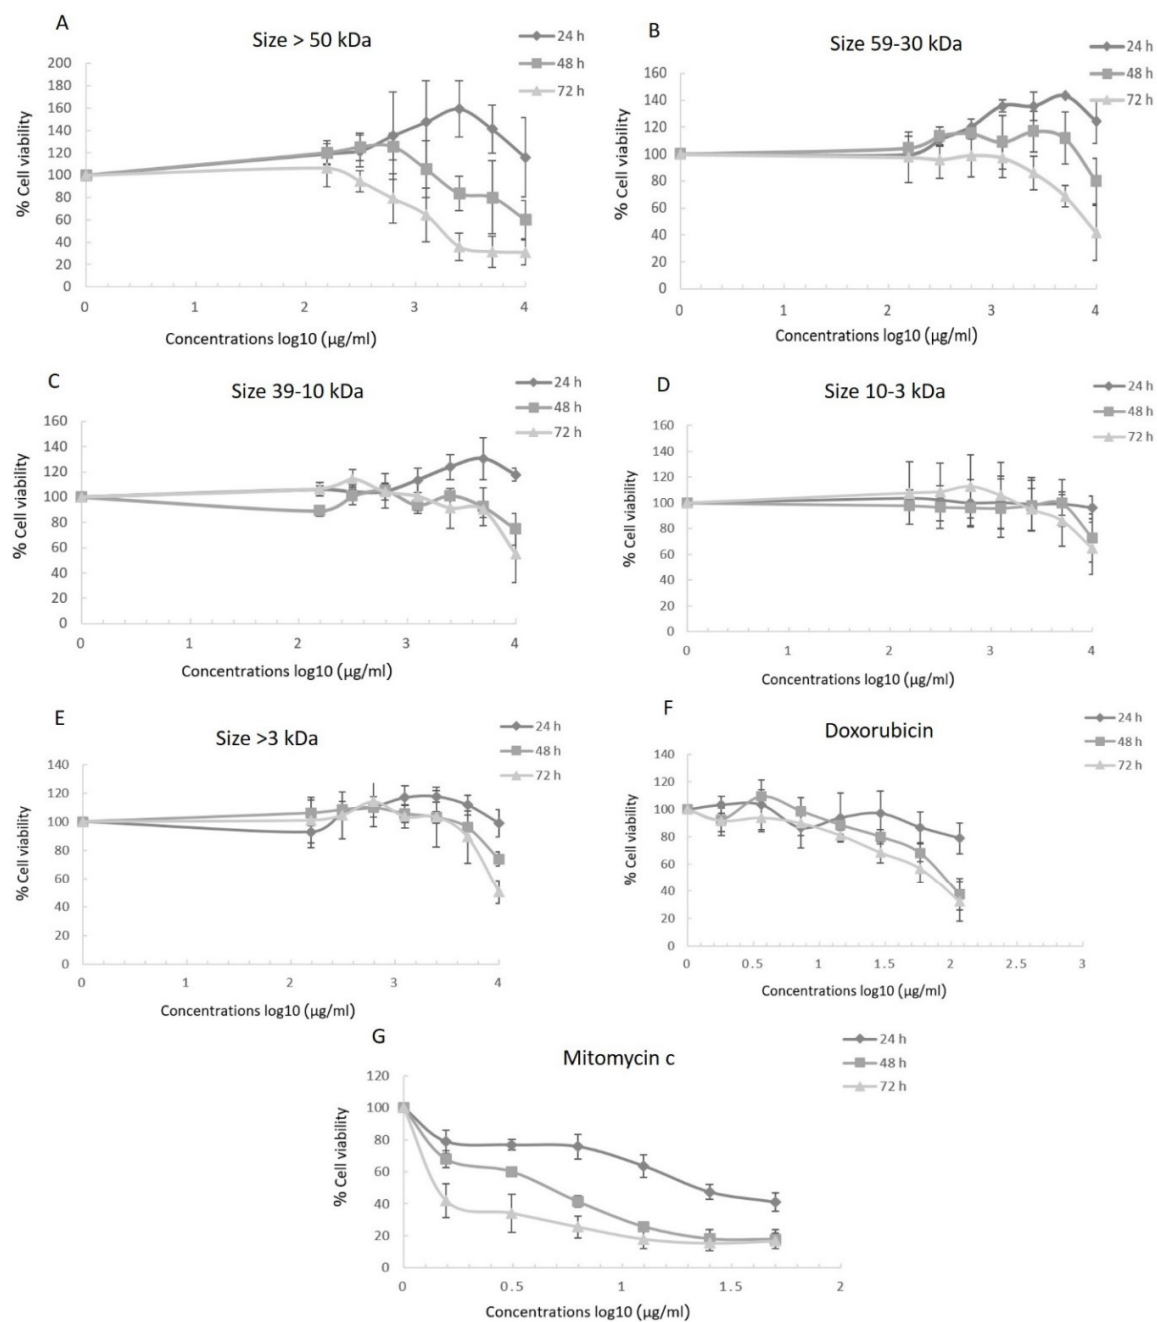

**Figure S3.** Cytotoxicity test by MTT assay on SW-620 cells after treated with fraction of HRBE concentrations 0–10,000 μg/mL including (A) >50 kDa, (B) 50–30 kDa, (C) 30–10 kDa, (D) 10–3 kDa and (E) <3 kDa fractions, (F) Doxorubicin concentration 0–116 μg/mL and (G) Mitomycin C concentrations 0 – 50 μg/mL for 24 h, 48 h and 72 h. The percentage of cell viability was determined as compared to an untreated condition. Data represented in the mean ± SD.
